# Supplementary material for: One-pot synthesis of CsPbBr3 nanocrystals in methyl methacrylate: a kinetic study, in situ polymerization, and backlighting applications
Source: Royal Society of Chemistry journal article supplement (doi:10.1039/d3tc00515a), 2023-01-01
Supplement: d3tc00515a1.pdf [file d3tc00515a1.pdf]

## Supplementary Material

### One-Pot Synthesis of CsPbBr<sub>3</sub> Nanocrystals in Methyl Methacrylate: Kinetic Study, *in situ* Polymerization, and Backlighting Application

Shuangshuang Shi, Hao Lv, Yingchao Ge, Yingying Wang, Shu Xu, Chong Geng\*

School of Electronics and Information Engineering, Hebei University of Technology, 5340 Xiping Road, Tianjin, 300401, P. R. China

\* Correspondence author: E-mail: Chong Geng: gengchong@hebut.edu.cn

**Table S1** PL emission peaks and FWHMs of PNCs synthesized in ODE (160°C, 100°C), toluene (100°C), MMA (100°C) and ethyl acetate (80°C).

|                       | ODE<br>@160°C | ODE<br>@100°C     | Toluene<br>@100°C | MMA<br>@100°C     | Ethyl acetate<br>@80°C |
|-----------------------|---------------|-------------------|-------------------|-------------------|------------------------|
| <b>Peaks<br/>(nm)</b> | 507           | 455<br>488<br>512 | 464<br>493<br>515 | 493<br>509<br>546 | 489                    |
| <b>FWHM<br/>(nm)</b>  | 24            | 38.99             | 37.4              | 32.15             | 34                     |

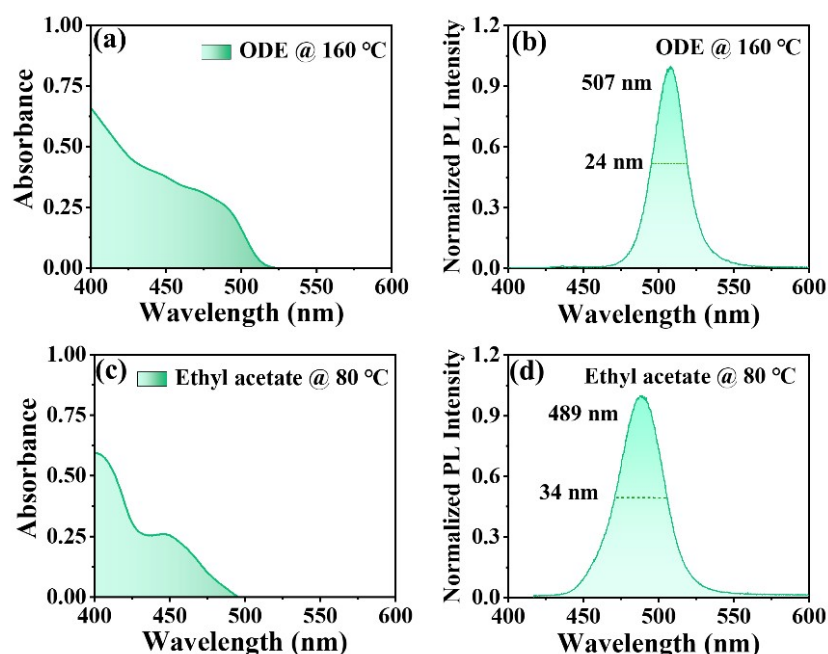

**Fig. S1** Spectra of PNCs synthesized by injection (a) absorbance spectra at 160°C in ODE, (b) PL spectra at 160°C in ODE, (c) absorbance spectra at 80°C in ethyl acetate, (d) PL spectra at 80°C in ethyl acetate.

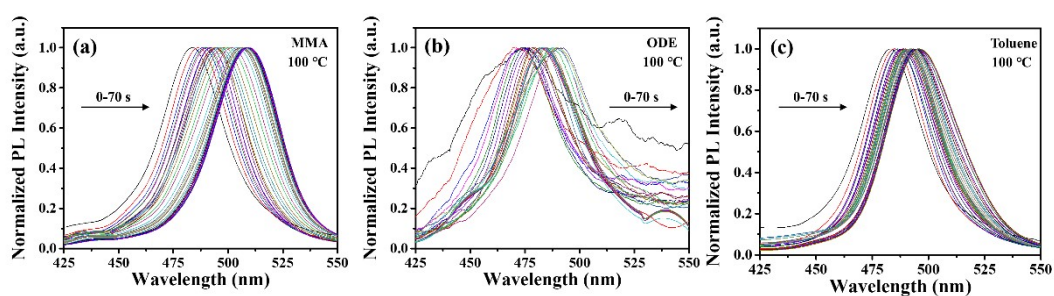

**Fig. S2** PL spectra of PNCs synthesized at 100 °C in (a) MMA, (b) ODE and (c) toluene.

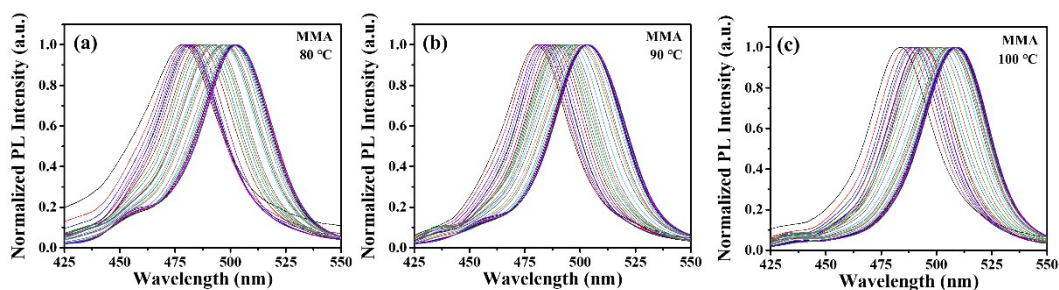

**Fig. S3** PL spectra of PNCs synthesized in MMA with different react temperature.

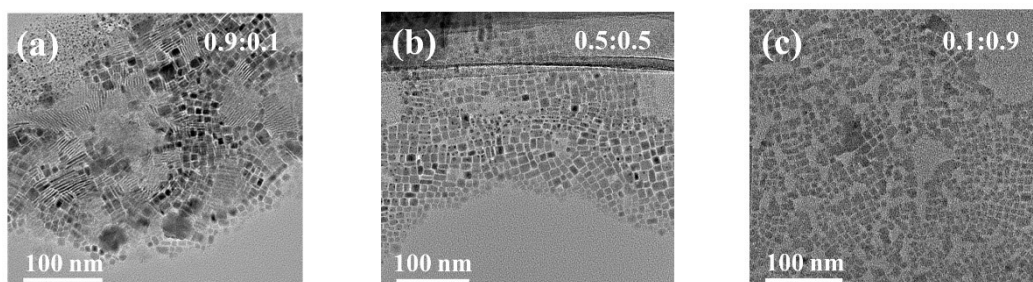

**Fig. S4** TEM morphology of PNCs obtained at the ratio of OA:OAm of (a) 0.9:0.1, (b) 0.5:0.5, and (c) 0.1:0.9.

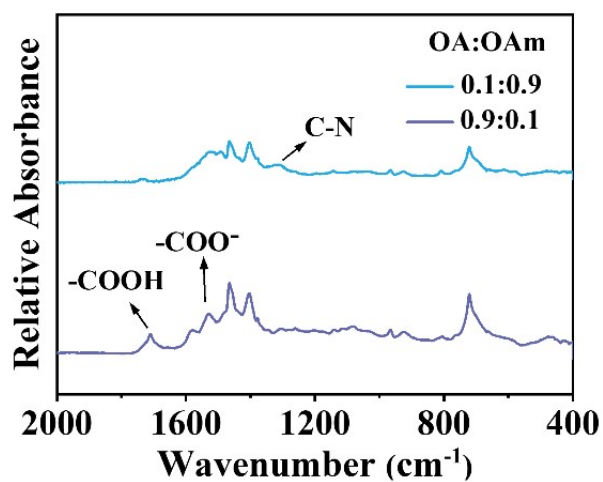

Fig. S5 FTIR spectra of PNCs prepared at the OA:OAm ratio of 0.9:0.1 and 0.1:0.9.

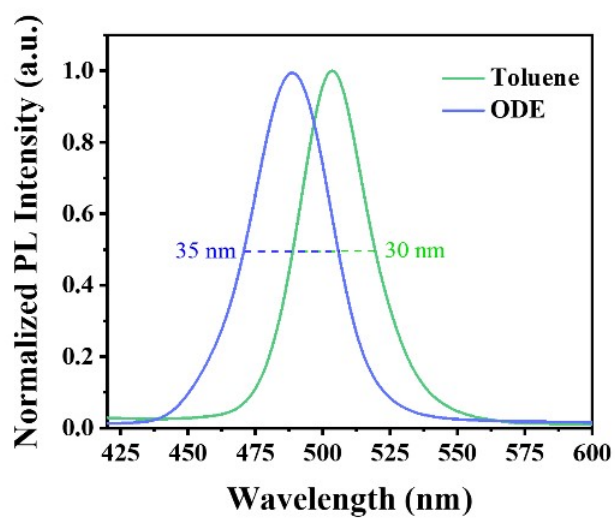

Fig. S6 PL spectra of PNCs prepared in ODE and toluene under amine-rich conditions.

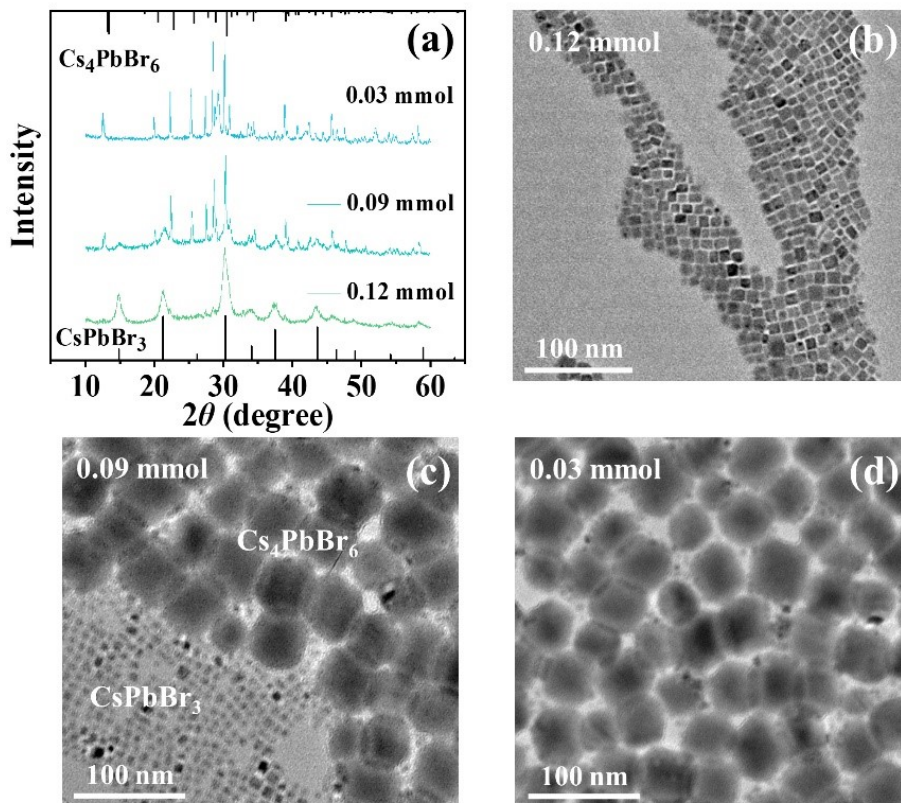

**Fig. S7** (a) XRD pattern of the PNCs prepared with different amount of  $\text{PbBr}_2$ . TEM images of the PNCs synthesized with (b) 0.12 mmol, (c) 0.09 mmol, and (d) 0.03 mmol  $\text{PbBr}_2$ .

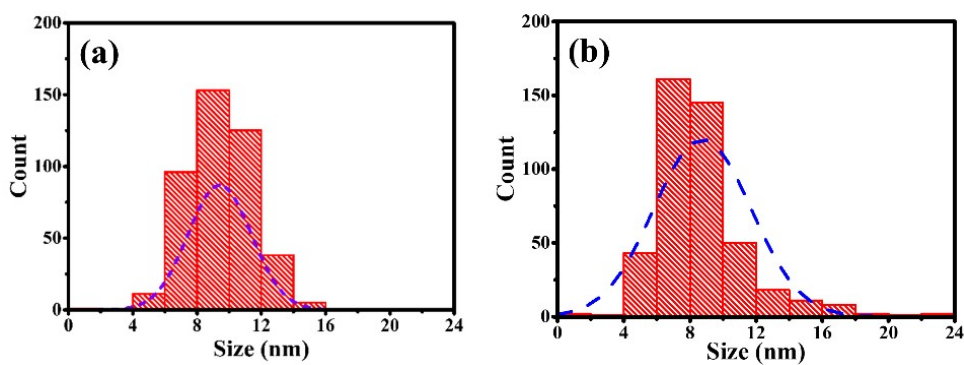

**Fig. S8** Histograms of the size distribution of the synthesized PNCs (a) 0.12 mmol  $\text{PbBr}_2$ , and (b) 0.18 mmol  $\text{PbBr}_2$ .

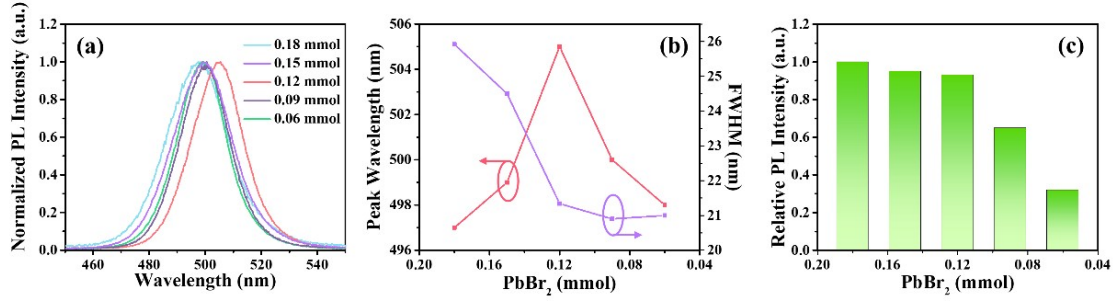

**Fig. S9** (a) PL spectra, (b) corresponding emission peak and FWHM change trend and (c) PL intensity of PNCs obtained at early growth time with different amount of PbBr<sub>2</sub> precursor.

**Table S2.** Time-resolved PL lifetime data of the PNCs synthesized in MMA through one-pot injection (OP) and recrystallization (RE) method.

| Sample  | $\tau_1$ (ns) | %     | $\tau_2$ (ns) | %     | $\tau_3$ (ns) | %     | $\bar{\tau}$ (ns) |
|---------|---------------|-------|---------------|-------|---------------|-------|-------------------|
| OP-PNCs | 4.86          | 38.50 | 18.63         | 41.05 | 101.84        | 20.45 | 30.34             |
| RE-PNCs | 4.91          | 17.9  | 27.55         | 27    | 240.27        | 55.10 | 140.7             |

The PL lifetime was fitted with a triple exponential decay function as shown below,

$$y = A_1 e^{-\frac{t}{\tau_1}} + A_2 e^{-\frac{t}{\tau_2}} + A_3 e^{-\frac{t}{\tau_3}}$$

where the  $A_i$  and  $\tau_i$  represent relative amplitude and the excited-state lifetime, respectively.  $\tau_1$  represents the radiative recombination path way of PNCs,  $\tau_2$  represents interaction between excitons and phonons, and  $\tau_3$  represents the interaction between excitons and defects. The OP-PNCs show an average decay time of 30.34 ns, while the RE-PNCs possess a long decay time of 140.7 ns. The higher proportion of  $\tau_1$  and  $\tau_2$  in OP-PNCs indicates a high proportion of direct recombination as well as strong exciton-phonon interaction, while the smaller proportion of  $\tau_3$  indicates lower defect concentration in OP-PNCs than in RE-PNCs.

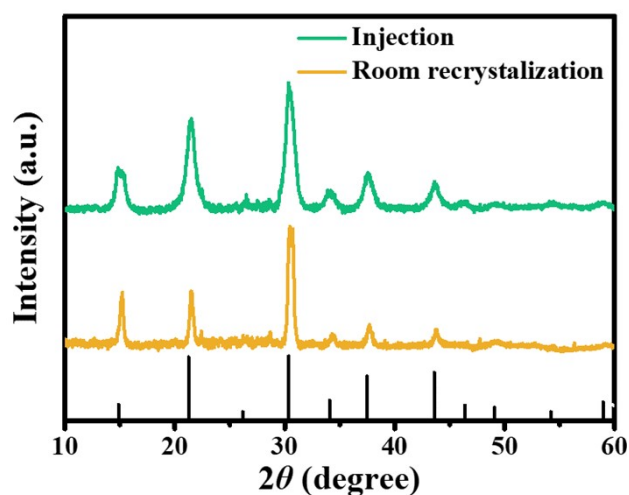

**Fig. S10** XRD diffraction pattern of PNCs synthesized by injection method (green line) and room temperature recrystallization method (yellow line) method.

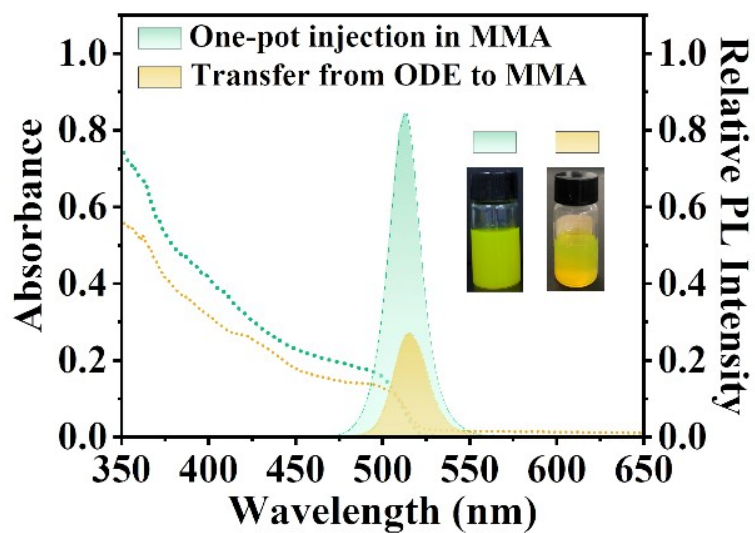

**Fig. S11** Absorption and PL spectra of the one-pot synthesized PNCs and the PNCs synthesized in ODE via hot injection and transferred in MMA.



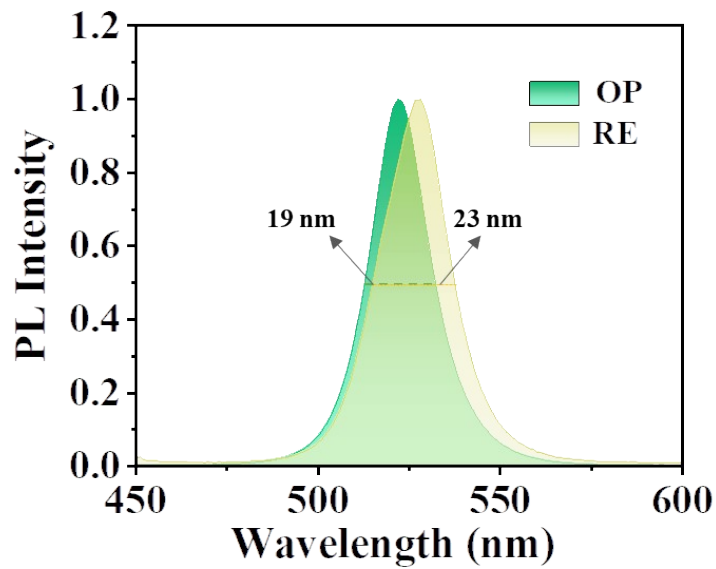

Fig. S12 Normalized PL spectra of the PNCs prepared by one-pot and recrystallization methods.

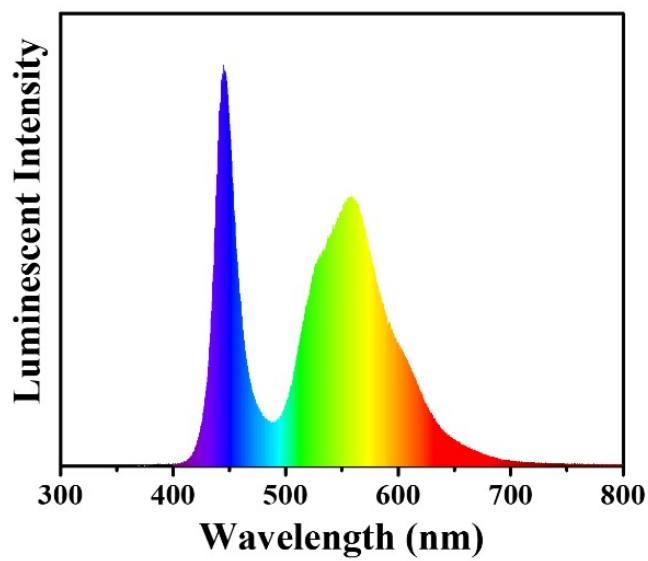

Fig. S13 Emission spectra of the original backlight module for LCD screen.
